# Supplementary material for: The ecdysone receptor complex is essential for the reproductive success in the female desert locust, Schistocerca gregaria
Source: PubMed Central journal article supplement (PMC6327042; doi:10.1038/s41598-018-36763-9), 2019-01-09
Supplement: 41598_2018_36763_MOESM1_ESM.pdf [file 41598_2018_36763_MOESM1_ESM.pdf]

# The ecdysone receptor complex is essential for the reproductive success in the female desert locust, *Schistocerca gregaria*

Cynthia Lenaerts<sup>1</sup>, Elisabeth Marchal<sup>1</sup>, Paulien Peeters<sup>1</sup>, Jozef Vanden Broeck<sup>1</sup>

<sup>1</sup>Molecular and Developmental Physiology and Signal Transduction research group, KU Leuven, Naamsestraat 59, P.O. Box 02465, B-3000 Leuven, Belgium.

**Correspondence:** Dr. Cynthia Lenaerts, Molecular and Developmental Physiology and Signal Transduction research group, KU Leuven, Naamsestraat 59, P.O. Box 02465, B-3000 Leuven, Belgium. E-mail: [cynthia.lenaerts@kuleuven.be](mailto:cynthia.lenaerts@kuleuven.be).

## Supplementary figure 1

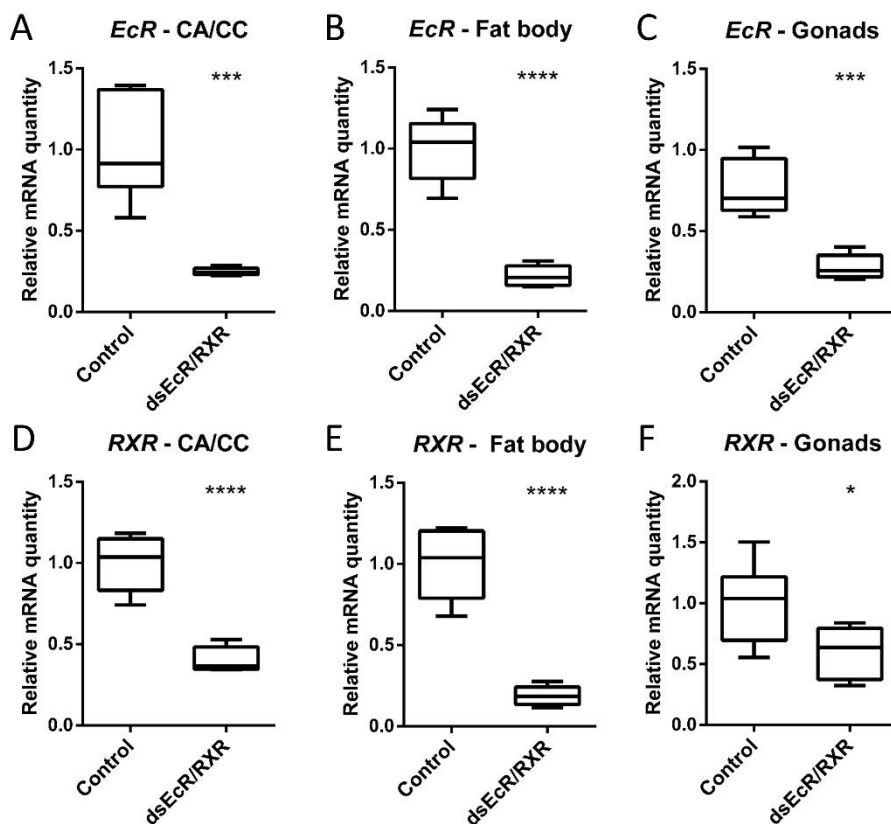

**Supplementary figure 1: Efficiency of the RNAi-mediated knockdown of the ecdysone receptor complex (*SchgrEcR/SchgrRXR*) in 12-day-old adult female *S. gregaria*.** Locusts were injected as described in materials and methods and dissected on day 12 of the adult stage. Relative transcript levels of (A-C) *SchgrEcR* and (D-F) *SchgrRXR* were measured in (A/D) the CA/CC complex, (B/E) the fat body and (C/F) the ovaries of 12-day-old female locusts, using qRT-PCR. The data represent box plots (min to max) of five independent pools of three locusts, run in duplicate and normalized to *CG13220* and  *$\alpha$ -tubulin1A* transcript levels for the ovaries, *CG13220*, *ubiquitin conjugating enzyme 10 (Ubi)* and *ribosomal protein 49 (RP49)* transcript levels for the fat body, and  *$\beta$ -actin* and *EF1 $\alpha$*  transcript levels for the CA/CC complex. Significant differences ( $p < 0.05$ ,  $p < 0.001$  and  $p < 0.0001$ ) are indicated by (an) asterisk(s) (\*, \*\*\* and \*\*\*\* respectively) (two-sided Welch's *t*-test on log-transformed data).

## Supplementary figure 2

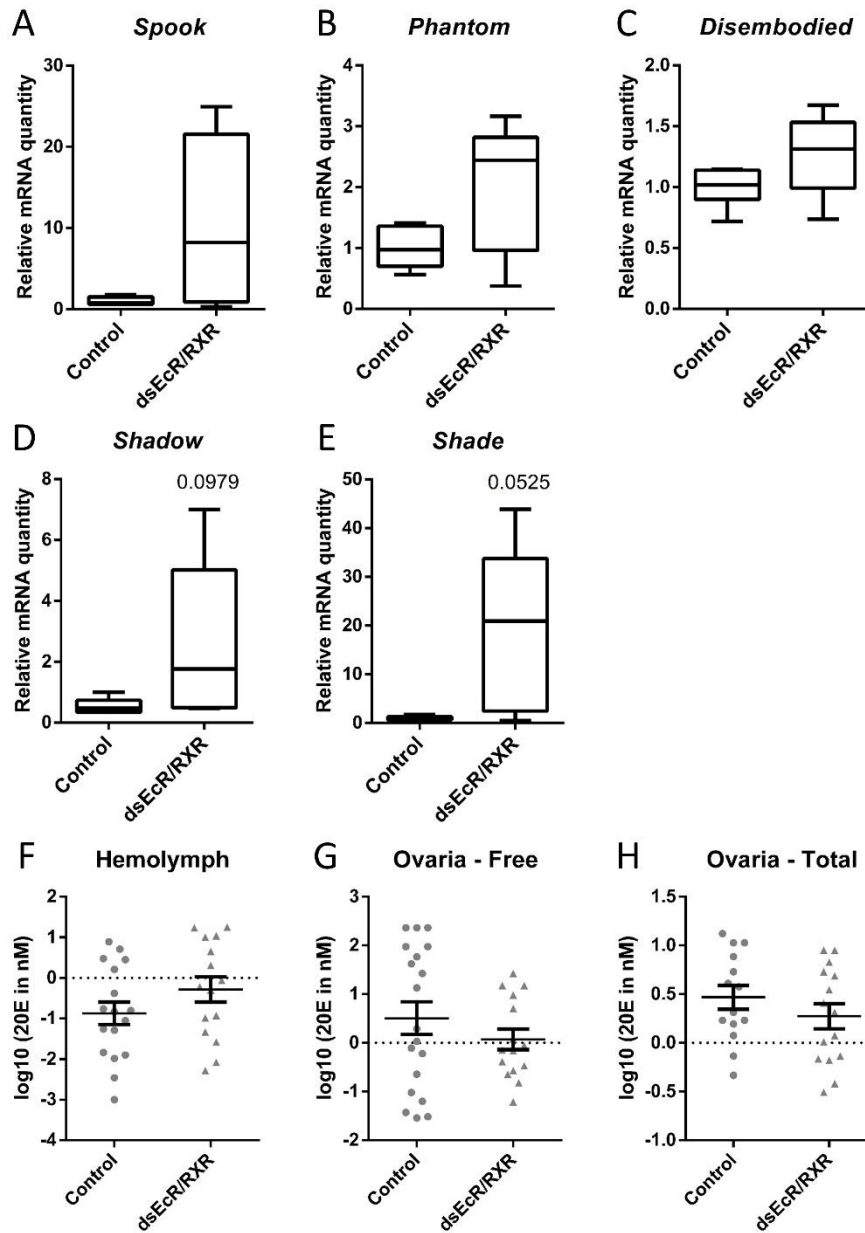

**Supplementary figure 2: Effect of RNAi-mediated knockdown of the ecdysone receptor complex (*SchgrEcr/SchgrRXR*) on ecdysteroid synthesis in 12-day-old adult female *S. gregaria*.** Locusts were injected as described in materials and methods and dissected on day 12 of the adult stage. (A-E) Relative transcript levels of the *Halloween* genes, *SchgrSpo*, *SchgrPhm*, *SchgrDib*, *SchgrSad* and *SchgrShd* were measured in the ovaries of 12-day-old control and *dsEcr/RXR*-treated adult *S. gregaria*, using qRT-PCR. The data represent box plots (min to max) of five independent pools of three locusts, run in duplicate and normalized to *CG13220* and  *$\alpha$ -tubulin1A* transcript levels. (F-G) Ecdysteroid titres in the haemolymph and free and total ecdysteroid levels in the ovaries of 12-day-old control and *dsEcr/RXR*-treated female locusts. Ecdysteroid titres, expressed in ng 20E equivalents per  $\mu$ L haemolymph, and ecdysteroid levels, expressed in ng 20E equivalents per ovary, were measured with an EIA. The data represent mean  $\pm$  S.E.M. of individual animals ( $n = 15-19$ ), as well as the individual values (grey dots). No significant differences were observed.

### Supplementary figure 3

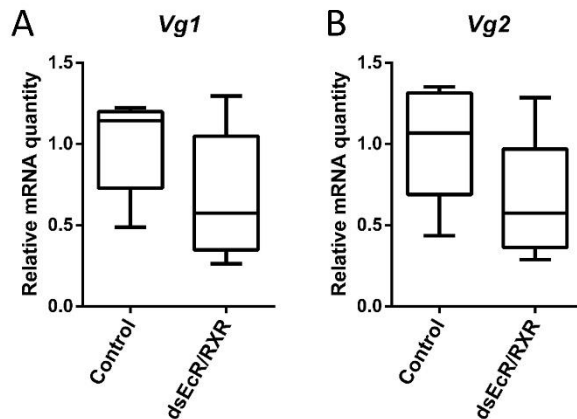

**Supplementary figure 3: Effect of RNAi-mediated knockdown of the ecdysone receptor complex (*SchgrEcR/SchgrRXR*) on vitellogenin synthesis in 12-day-old adult female *S. gregaria*.** Locusts were injected as described in materials and methods and dissected on day 12 of the adult stage. Relative transcript levels of *SchgrVg1* and *SchgrVg2* were measured in the fat body of 12-day-old control and dsEcR/RXR-treated adult *S. gregaria*, using qRT-PCR. The data represent box plots (min to max) of five independent pools of three locusts, run in duplicate and normalized to *CG13220*, *ubiquitin conjugating enzyme 10 (Ubi)* and *ribosomal protein 49 (RP49)* transcript levels.

## Supplementary table 1

Oligonucleotide sequences for primers used in qRT-PCR.

| Reference genes    | Forward primer                  | Reverse primer              |
|--------------------|---------------------------------|-----------------------------|
| <i>α-tubulin1A</i> | 5'-TGACAATGAGGCCATCTATG-3'      | 5'-TGCTTCCATACCCAGGAATGA-3' |
| <i>CG13220</i>     | 5'-TGTTTCAGTTTTGGCTCTGTTCTGA-3' | 5'-ACTGTTCTCCGGCAGAATGC-3'  |
| <i>Ubi</i>         | 5'-GACTTTGAGGTGTGGCGTAG-3'      | 5'-GGATCACAACACAGAACGA-3'   |
| <i>RP49</i>        | 5'-CGCTACAAGAAGCTTAAGAGGTCAT-3' | 5'-CCTACGGCGCACTCTGTTG-3'   |
| <i>β-actin</i>     | 5'-AATTACCATTGGTAACGAGCGATT-3'  | 5'-TGCTTCCATACCCAGGAATGA-3' |
| <i>EF1α</i>        | 5'-GATGCTCCAGGCCACAGAGA-3'      | 5'-TGCACAGTCGGCCTGTGAT-3'   |

  

| Target genes        | Forward primer                  | Reverse primer                        |
|---------------------|---------------------------------|---------------------------------------|
| <i>SchgrEcR</i>     | 5'-AAGGTTGATAATGCGGAATATGC-3'   | 5'-GTGATGGGCGCTCTGAAAAT-3'            |
| <i>SchgrRXR</i>     | 5'-AATGCCTCGCTATGGGAATG-3'      | 5'-TCCTTTGTTTCGCTGCCTTC-3'            |
| <i>SchgrE74</i>     | 5'-AAAGGAAGAGCCGTGAAG-3'        | 5'-CCCTGTTCTGCTCCACTTAAT-3'           |
| <i>SchgrE75</i>     | 5'-GCACACCAACAGCATGATCT-3'      | 5'-ACCACCGAGCAGAACAGC-3'              |
| <i>SchgrBr-C</i>    | 5'-CAGATCATCAGCACCACAATTACA-3'  | 5'-CGTGCCCGTTTGTTCGTT-3'              |
| <i>SchgrHR3</i>     | 5'-CACCAGTACAGGCAATGA-3'        | 5'-TCAGTTGCTAGCTCAAGAC-3'             |
| <i>SchgrFTZ-F1</i>  | 5'-CCTACTCTAGCCGATCACTTCAATG-3' | 5'-CAAATGTAATCGCTGAGGTCAAAT-3'        |
| <i>SchgrJHAMT</i>   | 5'-CGGAGCAAAGGCAAGCA-3'         | 5'-CCACTTACCCTGGTTT-3'                |
| <i>SchgrCYP15a1</i> | 5'-AAAGCAACTTCATCATTACAGATG-3'  | 5'-CAGAGCCAGCCATGAACAAA-3'            |
| <i>SchgrMet</i>     | 5'-GGTGCCTGAAGAGGAAGAAA-3'      | 5'-ATGGAGGTGATGAAGGAGAAAAG-3'         |
| <i>SchgrKr-h1</i>   | 5'-CTCCAAGACGTTTCATCCAGAG-3'    | 5'-TGCTTGGAGCAGGTGAAG-3'              |
| <i>SchgrInR</i>     | 5'TGGATGGCACCAGAAAGCTT-3'       | 5'-CACAGCACTACCCGTAGCT-3'             |
| <i>SchgrIRP</i>     | 5'-CCGTGGCAACTACAACCCAT-3'      | 5'-TCCGCGTCCGACACATCT-3'              |
| <i>SchgrNP1</i>     | 5'-CGCACGGACACGTCACA-3'         | 5'-GTGACACGTAGGCGAAAGGAA-3'           |
| <i>SchgrNP2</i>     | 5'-CGCTGGCGGTGACACA-3'          | 5'-CAAACCTCACTGTACAAAATAATAGACTAGA-3' |
| <i>SchgrNP3</i>     | 5'-GCGGAATCGGCATGGA-3'          | 5'-TCACAGAGCAACCGGAACATT-3'           |
| <i>SchgrNP4</i>     | 5'-TGCGGACTCTCCAGTGCTT-3'       | 5'-TGACACATTCATTCTCTTCTGACA-3'        |
| <i>SchgrVKR</i>     | 5'-GCATCTTGGCATTGATTTGCTA-3'    | 5'-GGAATCTCCATTTGTCAAGAGTT-3'         |
| <i>SchgrSpo</i>     | 5'-CAACATCTTACCAGCTACATGTG-3'   | 5'-GGGTCGTCGTAGTCGAAGGA-3'            |
| <i>SchgrPhm</i>     | 5'-CGCAGAGCCCGACAAC-3'          | 5'-CGAACATGTCGGCCATGA-3'              |
| <i>SchgrDib</i>     | 5'-CCCAGGCTGCTATCGAGACT -3'     | 5'-CGACGACCAGGCTATGTAGTT -3'          |
| <i>SchgrSad</i>     | 5'-ATCGTGGCCGAGATTACGAA -3'     | 5'-AGCACCATCTCCGGATCCT -3'            |
| <i>SchgrShd</i>     | 5'-CCGCCGTCATTGACTTCATA-3'      | 5'-GTGAGCTCCAAGCGTGG-3'               |
| <i>SchgrVg1</i>     | 5'-CCGCTGAACATCACTGCAAT-3'      | 5'-ACTTGGGCCAAATGGATGAG-3'            |
| <i>SchgrVg2</i>     | 5'-GCTACCCGCAATCTGTAATAACA-3'   | 5'-CGACTGTGAAAGGGCATTGA-3'            |

Abbreviations: *Ubi* = ubiquitin conjugating enzyme 10, *RP49* = ribosomal protein 49, *EF1α* = elongation factor 1 alpha, *EcR* = ecdysone receptor, *RXR* = retinoid-X-receptor, *Br-C* = Broad-Complex, *FTZ-F1* = fushi tarazu factor 1, *JHAMT* = juvenile hormone acid methyltransferase, *CYP15a1* = methyl farnesoate epoxidase, *Kr-h1* = Krüppel-homolog 1, *Met* = methoprene-tolerant receptor, *InR* = insuline receptor, *IRP* = insuline related peptide, *NP* = neuroparsin, *VKR* = venus kinase receptor, *Spo* = spook, *Phm* = phantom, *Dib* = disembodied, *Sad* = shadow, *Shd* = shade, *Vg* = vitellogenin

## Supplementary table 2

Oligonucleotide sequences for primers used in dsRNA construct design. Underlined sequences are the T7 promoter sequences.

| Target genes    | Forward primer                                                    | Reverse primer                                                     |
|-----------------|-------------------------------------------------------------------|--------------------------------------------------------------------|
| <i>SchgrEcR</i> | 5'- <u>GAAATTAATACGACTCACTATAGGGCC</u><br>ACGTGAGGTTTCGGCACATC-3' | 5'- <u>GAAATTAATACGACTCACTATAGGGCC</u><br>GTTTCCCCCATAACCAGCCAG-3' |
| <i>SchgrRXR</i> | 5'- <u>GAAATTAATACGACTCACTATAGGGCC</u><br>GCTCAATGGGTCCACAGTCA-3' | 5'- <u>GAAATTAATACGACTCACTATAGGGCC</u><br>ACACCATAATGCTTCCCGCT-3'  |
| <i>GFP</i>      | 5'- <u>TAATACGACTCACTATAGGGAGA</u><br>AAGGTGATGCTACATACGGAA-3'    | 5'- <u>TAATACGACTCACTATAGGGAGA</u><br>ATCCAGCAGCAGTTACAAAC-3'      |

Abbreviations: *EcR* = ecdysone receptor, *RXR* = retinoid-X-receptor, *GFP* = green fluorescent protein
